# Supplementary material for: Do Antioxidant Vitamins Prevent Exercise-Induced Muscle Damage? A Systematic Review
Source: Antioxidants (Basel). 2020 Apr 29;9(5):372. doi: 10.3390/antiox9050372 (PMC7278664; doi:10.3390/antiox9050372)
Supplement: Supplementary file 1 [file antioxidants-09-00372-s001.pdf]

## Supplementary Materials:

**Table S1.** Summary of the studies reviewed examining the effects of an acute dose of VitC or VitE in a single exercise session.

| Study                            | Subjects                                                                                                                | Muscle Function Measurements                                                                                                                                                                       | Other Variables                                                       |
|----------------------------------|-------------------------------------------------------------------------------------------------------------------------|----------------------------------------------------------------------------------------------------------------------------------------------------------------------------------------------------|-----------------------------------------------------------------------|
| Santos et al. 2016 [23]          | 9 physically active men<br>24.2 (2.17) years                                                                            | Not reported                                                                                                                                                                                       | Plasma cytokines<br>SaO2%                                             |
| Bohlouli et al. 2012 [28]        | 16 healthy untrained men<br>SUP ( <i>n</i> = 8)<br>21.5 ± 0.8 years<br>PLA ( <i>n</i> = 8)<br>22.1 ± 0.68 years         | Not reported                                                                                                                                                                                       | TAC, total leukocytes, neutrophils, lymphocytes, IL-6, CRP            |
| Nakhostin-Roohi et al. 2008 [29] | 16 healthy untrained males<br>SUP ( <i>n</i> = 8)<br>20.9 ± 0.7 years<br>PLA ( <i>n</i> = 8)<br>22.1 ± 0.6              | Not reported                                                                                                                                                                                       | TAC, leukocytes, IL-6, cortisol                                       |
| Nie & Lin 2004 [32]              | 16 male junior basketball players<br>SUP ( <i>n</i> = 8)<br>16.7 ± 0.3 years<br>PLA ( <i>n</i> = 8)<br>16.5 ± 0.2 years | Perceived muscle soreness in leg extensors (10 cm visual analogical scale)                                                                                                                         | Not reported                                                          |
| Thompson et al. 2001 [24]        | 9 healthy physically active men<br>28.4 ± 1.3 years                                                                     | General soreness and soreness during hamstrings curl and leg extension (10-point scale)<br>Muscle function in left and right extensors/flexors on an isokinetic dynamometer (% peak torque)<br>RPE | Uric acid, cortisol, total iron<br>AST<br>Blood lactate<br>Heart rate |

Aspartate aminotransferase (AST), C-reactive protein (CRP), interleukin-6 (IL-6), percentage oxygen saturation of haemoglobin (SaO2%), placebo group (PLA), rating of perceived exertion (RPE), supplemented group (SUP), total antioxidant capacity (TAC).

**Table 2.** Summary of studies reviewed examining the effects of chronic supplementation with VitC and/or VitE in one session or several sessions per week of exercise.

| Study                        | Subjects                                                                                                          | Muscle Function Measurements                                                                                                                                                              | Other Variables                                                                                                      |
|------------------------------|-------------------------------------------------------------------------------------------------------------------|-------------------------------------------------------------------------------------------------------------------------------------------------------------------------------------------|----------------------------------------------------------------------------------------------------------------------|
| De Oliveira et al. 2019 [25] | 21 male football players<br>SUP ( <i>n</i> = 11)<br>16.7 ± 0.3 years<br>PLA ( <i>n</i> = 10)<br>17.0 ± 0.3 years  | Femoral, buttocks, abdomen, total DOMS (10 points visual analogue scale)<br>SPE (10-point scale)<br>Performance parameters: vertical jump, agility, sprint time and fatigue index         | GSH/GSSG<br>Plasma FRAP                                                                                              |
| Chou et al. 2018 [26]        | 18 elite male taekwondoists<br>SUP ( <i>n</i> = 9)<br>21.0 ± 0.3 years<br>PLA ( <i>n</i> = 9)<br>21.3 ± 0.6 years | Not reported                                                                                                                                                                              | Heart rate<br>Lactate<br>Haematocrit and haemolysis<br>Circulating platelet-to-lymphocyte ratio                      |
| Mastaloudis et al. 2006 [31] | 22 female ( <i>n</i> = 11) and male ( <i>n</i> = 11) runners<br>39 ± 2.5 years                                    | MVC of the knee extensors and flexors (muscle torque, power deficits, rate of change of muscle torque and power)                                                                          | CRP                                                                                                                  |
| Avery et al. 2003 [33]       | 19 active males<br>SUP ( <i>n</i> = 9)<br>22.7 ± 4.1 years<br>PLA ( <i>n</i> = 9)<br>22.3 ± 3.6 years             | Perceived muscle soreness in shoulders, chest, quadriceps, hamstring (10 cm visual analogical scale)<br>Performance parameters: maximal strength, explosive power and muscular endurance. | Body composition                                                                                                     |
| Beaton et al. 2002 [34]      | 16 sedentary men<br>20.3 ± 1.7 years<br>SUP ( <i>n</i> = 9)<br>PLA ( <i>n</i> = 7)                                | Concentric peak torque<br>Isometric peak torque<br>Z Band Streaming<br>Perceived muscle soreness (10-point scale)                                                                         | Presence of macrophages and neutrophils in muscle fibres<br>Edema<br>Antibody staining against desmin and dystrophin |
| Niess et al. 2002 [22]       | 9 sedentary men<br>25.3 ± 1.0 years                                                                               | Maximal blood lactate and heart rates after incremental exercise test                                                                                                                     | Neutrophils, lymphocytes, monocytes<br>Leukocyte expression of HSP72                                                 |
| Dawson et al. 2002 [20]      | 15 experienced male runners<br>33 ± 2 years                                                                       | Not reported                                                                                                                                                                              | Individual subject ultrastructural muscle changes                                                                    |

|                                |                                                                                                                                                          |                                                                                                                                             |                                                                                                                                                               |
|--------------------------------|----------------------------------------------------------------------------------------------------------------------------------------------------------|---------------------------------------------------------------------------------------------------------------------------------------------|---------------------------------------------------------------------------------------------------------------------------------------------------------------|
| Petersen et al. 2001<br>[35]   | 24 male recreational runners<br>SUP ( <i>n</i> = 12)<br>28 (23-29) years<br>PLA ( <i>n</i> = 12)<br>26 (20-32) years                                     | Not reported                                                                                                                                | Leukocyte, monocytes                                                                                                                                          |
| Itoh et al. 2000 [36]          | 14 physically active males<br>SUP ( <i>n</i> = 7)<br>21.7 ± 1.9 years<br>PLA ( <i>n</i> = 7)<br>21.1 ± 2.3 years                                         | Aerobic work capacity (VO2 max and maximal heart rates)                                                                                     | Not reported                                                                                                                                                  |
| McBride et al., 1998<br>[21]   | 12 resistance trained men<br>SUP ( <i>n</i> = 12)<br>22.0 ± 0.85 years<br>PLA ( <i>n</i> = 12)<br>21.17 ± 0.65 years                                     | RPE<br>Average weight lifted, average percentage decrease in the mean weight lifted, average percentage of the 1RM, average total work (J). | Blood lactate                                                                                                                                                 |
| Rokitzki et al., 1994<br>[37]  | 16 male runners<br>SUP ( <i>n</i> = 12)<br>38.2 ± 7.1 years<br>PLA ( <i>n</i> = 12)<br>41.6 ± 9.8 years                                                  | Not reported                                                                                                                                | GPT, GOT, GSH-Px, catalase<br>B-Carotene, retinol, uric acid, selenium.<br>bilirubin, haptoglobin, total protein,<br>haematocrit, total protein, erythrocytes |
| Jakeman & Maxwell<br>1993 [39] | 24 physically active males ( <i>n</i> = 16) and females ( <i>n</i> = 8)<br>19.6 years (17.9-21.8)                                                        | MVC and ratio of the force generated at 20/50 Hz ratio of triceps surae                                                                     | Maximal oxygen uptake<br>Lactic acid<br>TAC                                                                                                                   |
| Cannon et al. 1990<br>[40]     | 21 sedentary males<br>Group 22-29 years<br>PLA ( <i>n</i> = 5)<br>SUP ( <i>n</i> = 4)<br>Group 55-74 years<br>PLA ( <i>n</i> = 6)<br>SUP ( <i>n</i> = 6) | Not reported                                                                                                                                | Circulating neutrophils, superoxide release from neutrophils                                                                                                  |

C-reactive protein (CRP), ferric reducing antioxidant power (FRAP), delayed-onset muscle soreness (DOMS), glutamate oxaloacetate transaminase (GOT), glutathione peroxidase (GSH-Px), glutamate pyruvate transaminase (GPT), maximal O2 uptake (VO2max), maximal voluntary contraction (MVC), one maximal repetition (1RM), oxidized glutathione (GSSG), placebo group (PLA), rating of perceived effort (RPE), reduced glutathione (GSH), subjective perception of effort (SPE), supplemented group (SUP), total antioxidant capacity (TAC).

**Table 3.** Summary of studies reviewed examining the effects of chronic supplementation with VitC and/or VitE over a long period of exercise.

| Study                                                                                                                                                                                                | Subjects                                                                                                                                                 | Muscle function measurements                                                                                                                                        | Other variables                                                                                                  |
|------------------------------------------------------------------------------------------------------------------------------------------------------------------------------------------------------|----------------------------------------------------------------------------------------------------------------------------------------------------------|---------------------------------------------------------------------------------------------------------------------------------------------------------------------|------------------------------------------------------------------------------------------------------------------|
| Mohammed et al. 2015 [27]                                                                                                                                                                            | 32 competitive male ( $n = 20$ ) and female ( $n = 12$ ) weightlifters<br>SUP ( $n = 16$ )<br>$16.5 \pm 2.2$ years<br>( $n = 16$ )<br>$15 \pm 1.7$ years | Not reported                                                                                                                                                        | Anthropometric measurements                                                                                      |
| Zoppi et al. 2006 [30]                                                                                                                                                                               | 10 professional male football players<br>SUP ( $n = 5$ )<br>$18.3 \pm 0.5$<br>PLA ( $n = 5$ )<br>$18 \pm 1.0$                                            | Aerobic capacity (anaerobic threshold)<br>Maximal speed<br>Strength (1RM)                                                                                           | Catalase, glutathione reductase, carbonyl derivatives                                                            |
| Rokitzi et al., 1994 [38]                                                                                                                                                                            | 30 professional male cyclists<br>SUP ( $n = 15$ )<br>$23.4 \pm 2.4$ years<br>PLA ( $n = 15$ )<br>$22.5 \pm 3.1$ years                                    | Performance parameters: heart rate, blood lactate concentration and physical performance (W/kg body weight) determined at aerobic threshold and anaerobic threshold | Erythrocytes, haematocrit, haemoglobin, GOT, GPT, hydroxybutyrate-deshydrogenase, alkaline phosphatase, gamma-GT |
| Gamma glutamyltransferase (gamma-GT), glutamate oxaloacetate transaminase (GOT), glutamate pyruvate transaminase (GPT), one maximal repetition (1RM), placebo group (PLA), supplemented group (SUP). |                                                                                                                                                          |                                                                                                                                                                     |                                                                                                                  |
